# Supplementary material
Source: PubMed Central journal article supplement (PMC7613433)
Supplement: EMS151271-supplement-Supplementary_Tables.pdf [file EMS151271-supplement-Supplementary_Tables.pdf]

Supplementary Table 1. Scopus search terms

---

(( TITLE-ABS-KEY ( child\* OR boy\* OR girl\* OR teen\* OR adolesc\* OR youth OR young\* OR dyad\* ) ) AND ( TITLE-ABS-KEY ( parent\* OR mom\* OR mum\* OR dad\* OR mother\* OR father\* OR famil\* OR dyad\* ) ) ) AND ( TITLE-ABS-KEY ( trial\* OR intervention\* OR experiment\* ) ) AND ( TITLE ( review OR "meta-analys\*" ) ) AND ((( TITLE-ABS-KEY ( "physical activit\*" OR exercis\* OR sport\* OR fitness OR "activity intens\*" OR "activity level\*" OR movement ) ) OR ( TITLE-ABS-KEY ( overweight OR obesity OR adipos\* OR "body mass" OR "body weight" OR "waist circumference" OR "weight loss" ) ) OR ( TITLE-ABS-KEY ( "healthy eat\*" OR "healthy snack\*" OR beverage\* OR diet\* OR nutrition OR vegetable\* OR fruit\* OR "energy intake" OR "energy balanc\*" OR "soft drink\*" OR soda OR sugar\* ) ) ) ) OR ( TITLE-ABS-KEY ( sedentar\* OR screen\* OR game\* OR computer\* OR television OR tv OR tablet\* ) ) ) AND ( LIMIT-TO ( DOCTYPE , "re" ) OR LIMIT-TO ( DOCTYPE , "ar" ) OR LIMIT-TO ( DOCTYPE , "ip" ) ) AND ( LIMIT-TO ( LANGUAGE , "English" ) ).

---

**Note.** The same key words were used in our searches of the other three databases (Cochrane Library, PubMed, PsycINFO).

**Supplementary Table 2.** Overview of experts' top recruitment strategies and mean ratings for each strategy's effectiveness and resource efficiency.

| Category                   | Strategy                                                                                                                                                         | N  | Mean | SD  |
|----------------------------|------------------------------------------------------------------------------------------------------------------------------------------------------------------|----|------|-----|
|                            | Referral                                                                                                                                                         |    |      |     |
|                            | Schools                                                                                                                                                          |    |      |     |
| Media (print & electronic) | Word-of-mouth                                                                                                                                                    | 23 | 4.8  | 1.8 |
|                            | Schools                                                                                                                                                          | 25 | 4.4  | 1.7 |
|                            | Social media posts (e.g., Facebook, Twitter)                                                                                                                     | 22 | 4.3  | 1.7 |
| Employers                  | Study information emailed to employees from within organisation on behalf of the research team (e.g., an email sent from HR to employees within an organisation) | 24 | 4.2  | 1.4 |
| Schools                    | Assembly delivered to parents by research team                                                                                                                   | 25 | 4.2  | 2.0 |
| Primary care               | Letters sent from GPs or health care providers on behalf of research team                                                                                        | 23 | 4.2  | 1.8 |
| Community                  | Research team speaking to parents while waiting for their children (e.g., while parents are waiting during their child's swimming lesson)                        | 24 | 4.1  | 2.0 |
| Primary care               | Letters from research team directly to potential participants                                                                                                    | 23 | 4.0  | 1.8 |
| Schools                    | Research team attending parent meetings (e.g., orientation meetings, Parent Teacher Association meetings)                                                        | 25 | 4.0  | 1.9 |
| Media (print & electronic) | Television (local news story promoting study)                                                                                                                    | 22 | 4.0  | 2.0 |
| Media (print & electronic) | E-blasts (e.g., University news, 3rd party media groups, corporate mailing lists)                                                                                | 22 | 4.0  | 1.6 |
| Media (print & electronic) | Electronic newsletter mailing list                                                                                                                               | 22 | 3.9  | 1.4 |
| Schools                    | Leaflets via email (e.g., ParentMail) or other 3rd party companies (e.g., Peachjar)                                                                              | 25 | 3.9  | 1.5 |
| Community                  | Research team speaking to parents during pick up time (e.g., at the end of an after-school program or summer camp day)                                           | 24 | 3.9  | 2.0 |
| Schools                    | Research team attending school events (e.g., sports day)                                                                                                         | 25 | 3.8  | 1.9 |
| Media (print & electronic) | Radio (ads or story promoting study)                                                                                                                             | 23 | 3.8  | 1.9 |
| Schools                    | Study information in school newsletter (hard copy)                                                                                                               | 25 | 3.8  | 1.4 |
| Community                  | Hard copy leaflets to parents                                                                                                                                    | 24 | 3.7  | 1.6 |
| Primary care               | Phone calls from research team directly to potential participants                                                                                                | 23 | 3.7  | 2.1 |
| Schools                    | Assembly delivered to students by research team                                                                                                                  | 25 | 3.7  | 1.5 |
| Media (print & electronic) | Print - newspaper (ads or story promoting study)                                                                                                                 | 23 | 3.6  | 1.6 |
| Primary care               | Pull tab poster displays in GP clinic                                                                                                                            | 22 | 3.6  | 1.1 |
| Schools                    | Hard copy leaflets to parents via children                                                                                                                       | 25 | 3.6  | 1.7 |
| Schools                    | Study information written in students' diary/agenda                                                                                                              | 25 | 3.6  | 1.5 |
| Primary care               | Hard copy leaflets displayed in GP clinic                                                                                                                        | 23 | 3.5  | 1.1 |
| Employers                  | Hard copy leaflets displayed in employee common areas (e.g., kitchen)                                                                                            | 24 | 3.5  | 1.3 |
| Media (print & electronic) | Print - other local publications (ads or story promoting study)                                                                                                  | 23 | 3.4  | 1.3 |
| Community                  | Electronic neighbourhood bulletin boards                                                                                                                         | 23 | 3.4  | 1.1 |

|                            |                                                                                |    |     |     |
|----------------------------|--------------------------------------------------------------------------------|----|-----|-----|
| Community                  | Pull tab poster displays                                                       | 23 | 3.4 | 1.1 |
| Schools                    | Research team hosting parent/researcher night to discuss study                 | 25 | 3.4 | 1.7 |
| Community                  | Pop-up stands disseminating study information directly (e.g., at local market) | 24 | 3.4 | 1.7 |
| Media (print & electronic) | Craigslist (an American classified ad website)                                 | 20 | 3.4 | 1.5 |
| Media (print & electronic) | Print - magazines (ads or story promoting study)                               | 23 | 3.4 | 1.3 |
| Schools                    | Research team speaking to parents during 'pick up' time                        | 25 | 3.3 | 2.0 |
| Schools                    | Research team hosting after school 'drop-in' sessions for parents              | 25 | 3.1 | 1.6 |

**Note.** Experts rated each strategy using a 4-point Likert scale (4 = very effective/resource-efficient, 3 = effective/resource-efficient, 2 = slightly effective/resource-efficient and 1 = not effective/resource-efficient). Scores for effectiveness were weighted more heavily, by a factor of 2, than scores for resource efficiency. Therefore, the maximum weighted score for effectiveness was 8 and the minimum score was 2 and the maximum score for resource-efficiency was 4 and the minimum score was 1.
